# Supplementary material for: A microfluidic route to small CO2microbubbles with narrow size distribution
Source: Royal Society of Chemistry journal article supplement (doi:10.1039/b914572a), 2009-12-03
Supplement: b914572a.pdf [file b914572a.pdf]

# **Supplementary Information for**

## **A microfluidic route to small CO<sub>2</sub> microbubbles with narrow size distribution**

**Jai Il Park,<sup>a</sup> Zhihong Nie,<sup>a,b</sup> Alexander Kumachev,<sup>a</sup> Eugenia Kumacheva<sup>\*a</sup>**

<sup>a</sup> *Department of Chemistry, University of Toronto, 80 St. George Street, Toronto, Ontario, Canada M5S 3H6. Fax: +1 416 978 3576, Tel: +1 416 978 3576; E-mail: [ekumacheva@chem.utoronto.ca](mailto:ekumacheva@chem.utoronto.ca)*

<sup>b</sup> *Department of Chemistry and Chemical Biology, Harvard University, 12 Oxford Street, Cambridge, MA 02138, USA*

## Schematic of the devices

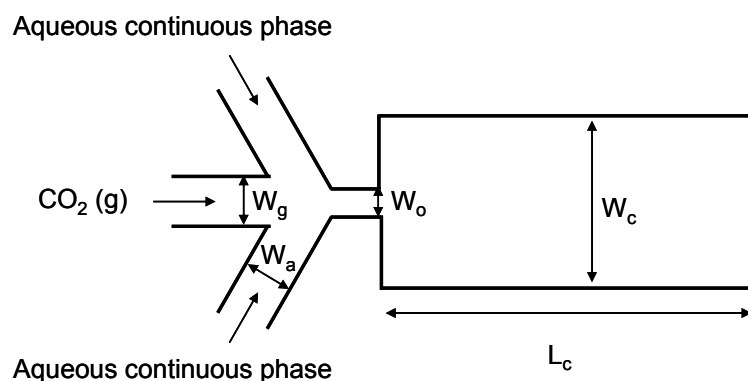

**Figure S1.** Schematics of microfluidic bubble generator. For the study of CO<sub>2</sub> bubble dissolution,  $W_g=50\ \mu\text{m}$ ,  $W_a=80\ \mu\text{m}$ ,  $W_o=33\ \mu\text{m}$ ,  $W_c=230\ \mu\text{m}$ , and  $L_c=230\ \text{mm}$ . Height of the channel is  $115\ \mu\text{m}$ ; for the production of small bubble ( $<10\ \mu\text{m}$ ),  $W_g=40\ \mu\text{m}$ ,  $W_a=70\ \mu\text{m}$ ,  $W_o=22\ \mu\text{m}$ ,  $W_c=60\ \mu\text{m}$  (increased to  $500\ \mu\text{m}$  at the distance  $500\ \mu\text{m}$  away from the orifice), and  $L_c=150\ \text{mm}$ . The height of the channels is  $40\ \mu\text{m}$

## Estimation of the concentration of dissolved CO<sub>2</sub>.

The dissolution of carbon dioxide  $\text{CO}_2(\text{g}) \leftrightarrow \text{CO}_2(\text{l})$  is described by Henry's law as

$$[\text{CO}_2]_l = k_H \times P_{\text{CO}_2} \quad (1)$$

where  $k_H$  is Henry's law constant and the following reactions between CO<sub>2</sub> and OH<sup>-</sup> or H<sub>2</sub>O<sup>1,2</sup>

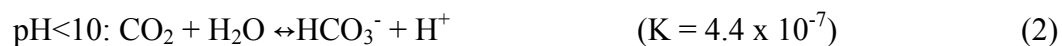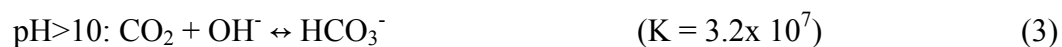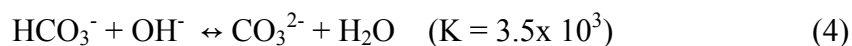

where  $K$  is equilibrium constant.

The value of  $k_H$  depends on the concentration of the ionic species in water as  $k_H = k_H^0 \times 10^{-0.138I}$  where  $k_H^0$  is Henry's law constant for  $\text{CO}_2$  in pure water ( $k_H^0 = 3.3 \times 10^{-4} \text{ mol}/(\text{L kPa})$ ) and  $I$  is the ionic strength,  $I = 0.5 \sum C_i z_i^2$  and  $C_i$  is the concentration of ions with charge  $z$ .<sup>1</sup>

At  $\text{pH} < 5$ , the total concentration of dissolved  $\text{CO}_2$  is determined by Henry's law,<sup>3</sup> whereas at  $\text{pH} \geq 5$ , the total concentration of dissolved  $\text{CO}_2$  can be estimated by adding the unreacted amount of  $\text{CO}_2$  (determined by Henry's law) and reacted  $\text{CO}_2$  (following eq. 2-4).<sup>1</sup>

Below we show the detailed calculation of the total concentration of dissolved  $\text{CO}_2$  for  $\text{pH} = 13.2$ ,  $k_H = 3.2 \times 10^{-4} \text{ mol}/(\text{L kPa})$  and  $P_{\text{CO}_2} = 27.6 \text{ kPa}$ . Based on eq. (1),  $[\text{CO}_2]_l \approx 0.009 \text{ mol/L}$  and the reaction (2), we determined the concentration of reacted  $\text{CO}_2$  as follows.

|                       |                  |   |               |                   |                  |                       |
|-----------------------|------------------|---|---------------|-------------------|------------------|-----------------------|
|                       | $\text{CO}_2(l)$ | + | $\text{OH}^-$ | $\leftrightarrow$ | $\text{HCO}_3^-$ | $K = 3.2 \times 10^7$ |
| Initial concentration | 0.009            |   | 0.16          |                   |                  |                       |
| Reacted concentration | $-x$             |   | $-x$          |                   | $x$              |                       |
| Final concentration   | $0.009 - x$      |   | $0.16 - x$    |                   | $x$              |                       |

$$x \approx 0.009 \text{ mol/L}$$

The total amount of dissolved  $\text{CO}_2$  (both reacted and unreacted) is  $[\text{CO}_2]_l + x$ , that is,  $\approx 0.018 \text{ mol/L}$ .

Using the same approach we found that for  $\text{pH} = 11$ , the concentration of dissolved  $\text{CO}_2$  was *ca.*  $0.01 \text{ mol/L}$ . For  $5 \leq \text{pH} < 10$ , by combining Henry's law (eq. 1) and reaction (2), we determined the total concentration of dissolved  $\text{CO}_2$  to be approximately  $0.009 \text{ mol/L}$ .

For  $\text{pH} = 1.5$ , we used Henry's law (eq. (1)) and found the total concentration of dissolved  $\text{CO}_2$  to be *ca.*  $0.009 \text{ mol/L}$ .

## References

1. P. V. Danckwerts, *Gas-liquid Reactions*, McGraw-Hill Book Company, New York, 1970.
2. T. Madhavi, A. K. Golder, A. N. Samanta and S. Ray, *Chem. Eng. J.*, 2007, **128**, 95-104.
3. J. N. Butler, *Carbon dioxide equilibria and their applications*, Lewis Publisher, Michigan, 1981.
